# Supplementary material for: Bioluminescence imaging of G protein-coupled receptor activation in living mice
Source: PubMed Central journal article supplement (PMC5660082; doi:10.1038/s41467-017-01340-7), 2017-10-27
Supplement: 41467_2017_1340_MOESM1_ESM.pdf [file 41467_2017_1340_MOESM1_ESM.pdf]

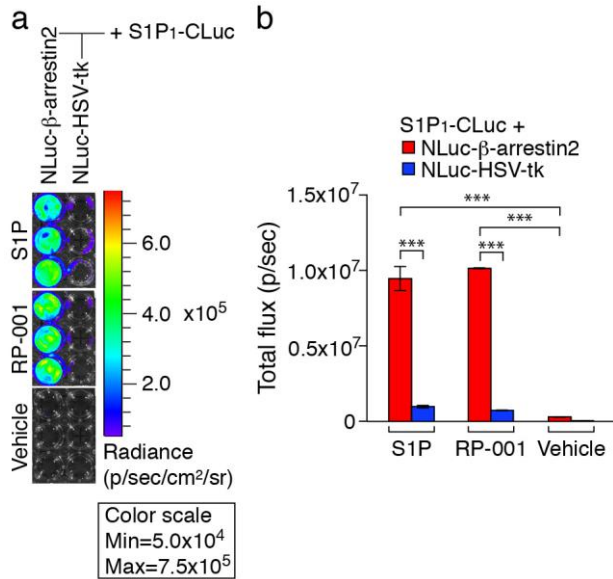

**Supplementary Figure 1. Specificity of the agonist-induced S1P<sub>1</sub>-CLuc and NLuc-β-arrestin2 interaction.** **a**, U2OS cells were plated in 24-well plates, transfected by pcDNA3.1-S1P<sub>1</sub>-CLuc (10 ng) with pcDNA3.1-NLuc-β-arrestin2 (500 ng) or pcDNA3.1-NLuc-HSV-tk (500 ng), treated with S1P, RP-001 (10<sup>-6</sup> M), or vehicle and D-luciferin, then immediately subjected to BLI. Imaging was for a 3-min period. The experiment was repeated twice and representative images are shown. **b**, The bioluminescence activity was quantified by determining the total flux (photons/sec; p/sec). Data represent the mean ± SEM, n=3. *P*-values were determined by one-way ANOVA followed by Tukey's multiple comparisons test); \*\*\*, *P* ≤ 0.001.

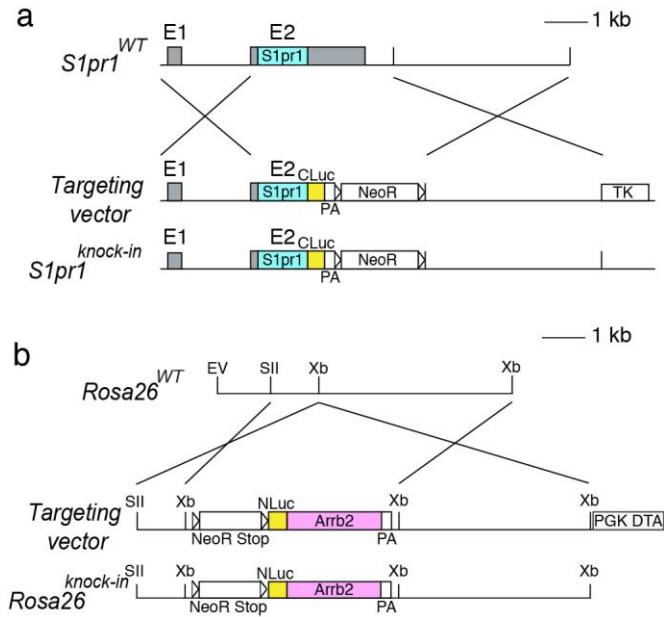

**Supplementary Figure 2. Gene targeting to produce S1P<sub>1</sub>-CLuc and NLuc- $\beta$ -arrestin2 knock-in alleles in mouse embryonic stem cells.** The homologous recombination targeting schemes for modifying the *S1pr1* and *Rosa26* loci are shown in (a) and (b), respectively. For each panel, the WT genes are shown at the top, the targeting vectors are shown in the middle, and the recombined knock-in alleles are shown at the bottom. *Arrb2*,  $\beta$ -arrestin2; PA, polyadenylation sequence; PGK DTA, phosphoglycerate kinase I promoter and A subunit of the diphtheria toxin gene; NeoR, neomycin resistance gene; triangles, loxP sites; E1, exon 1; E2, exon 2; TK, thymidine kinase; CLuc, C-terminal firefly luciferase fragment (amino acids # 394–550); N-Luc, N-terminal firefly luciferase fragment (amino acids # 1–416).

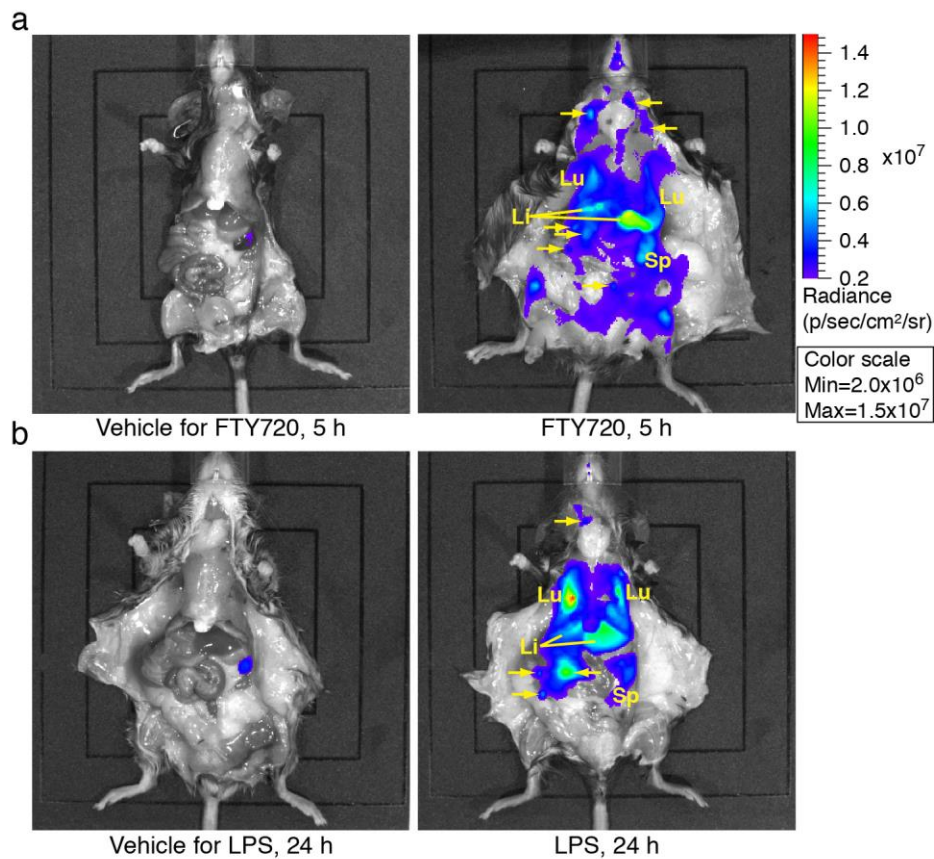

**Supplementary Figure 3. S1P<sub>1</sub> activation by FTY720 and LPS in internal organs.** S1P<sub>1</sub> luciferase signaling mice were injected intraperitoneally with FTY720 (a) or LPS (b) and imaged with organs exposed to identify specific regions with high S1P<sub>1</sub> activation. Control mice received vehicle. While under deep anesthesia, the groups of mice (n = 5) were subjected to BLI after the thoracic region and abdominal cavity were opened, 5 h or 24 h after FTY720 and vehicle, or LPS and vehicle, administration, respectively. A representative image from each group of mice is shown. Mice were imaged in the supine position. Intensities are shown in units of photons/sec/cm<sup>2</sup>/steradian (p/sec/cm<sup>2</sup>/sr). Arrows, lymph node; Li, liver; Sp, spleen; Lu, lung.

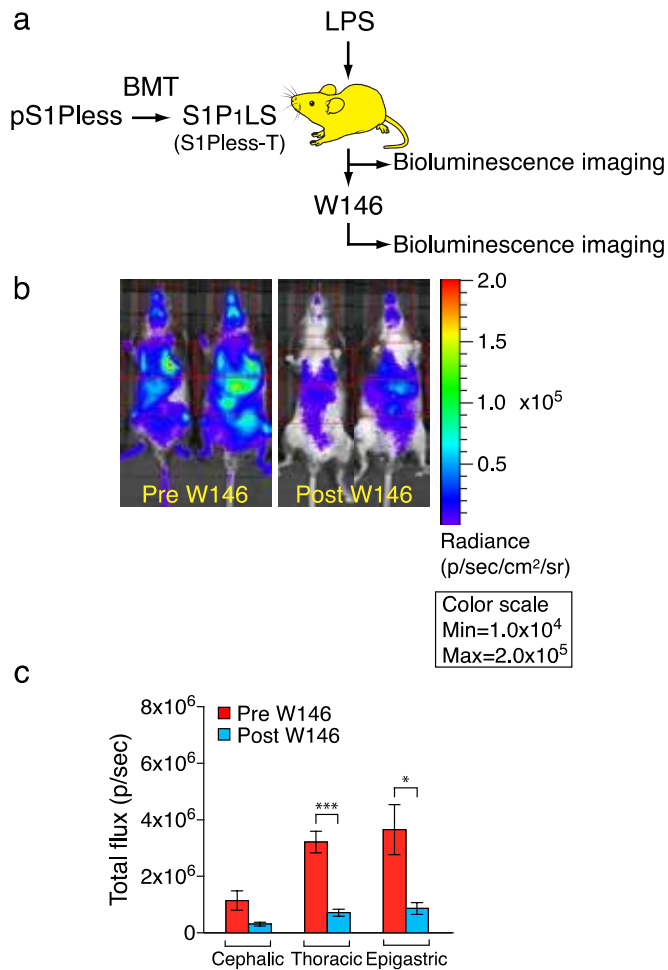

**Supplementary Figure 4. Inhibition of S1P<sub>1</sub> activation by an S1P<sub>1</sub> antagonist during LPS-induced systemic inflammation in live mice transplanted with plasmaS1Pless bone marrow.**

**a**, Bone-marrow cells from plasma(p)S1Pless mice were transplanted (BMT) into irradiated S1P<sub>1</sub> luciferase signaling (S1P<sub>1</sub>LS) mice. LPS was injected intraperitoneally into the stably transplanted mice 10 weeks later. After 24 h, the mice were intraperitoneally injected with the S1P<sub>1</sub> antagonist W146 (10 mg/kg). Mice were subjected to BLI immediately prior to and 0.5 h post-W146 injection. **b**, Representative bioluminescence images of the same S1P<sub>1</sub> luciferase signaling mice transplanted with pS1Pless bone marrow immediately prior to and 0.5 h post-W146 injection. Mice were imaged in the supine position. Red open rectangles representing regions of interest (ROI) were positioned around cephalic, thoracic, and epigastric regions. **c**, The

bioluminescence activity was quantified by determining the total flux (photons/sec; p/sec) in each ROI. Data represent the mean  $\pm$  SEM. n=6 for both groups of mice. *P*-values were determined by two-tailed Student's *t*-test; \*,  $P \leq 0.05$ , \*\*\*,  $P \leq 0.001$ .

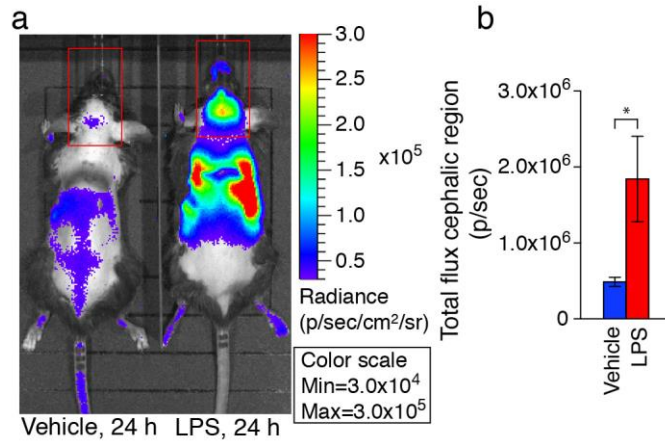

**Supplementary Figure 5. S1P<sub>1</sub> activation during LPS-induced systemic inflammation in the cephalic region.** S1P<sub>1</sub> luciferase signaling mice were injected intraperitoneally with vehicle or LPS to induce systemic inflammation, then subjected to BLI. **a**, Representative bioluminescence image of mice 24 h after LPS or vehicle injection. Mice were imaged in the prone position. A red open rectangle representing the ROI was positioned around the cephalic region. **b**, The bioluminescence activity was quantified by determining the total flux (photons/sec; p/sec) in the cephalic ROI. Data represent the mean ± SEM. n=8 for PBS, n=9 for LPS. *P*-values were determined by two-tailed Student *t*-test; \*, *P* ≤ 0.05.

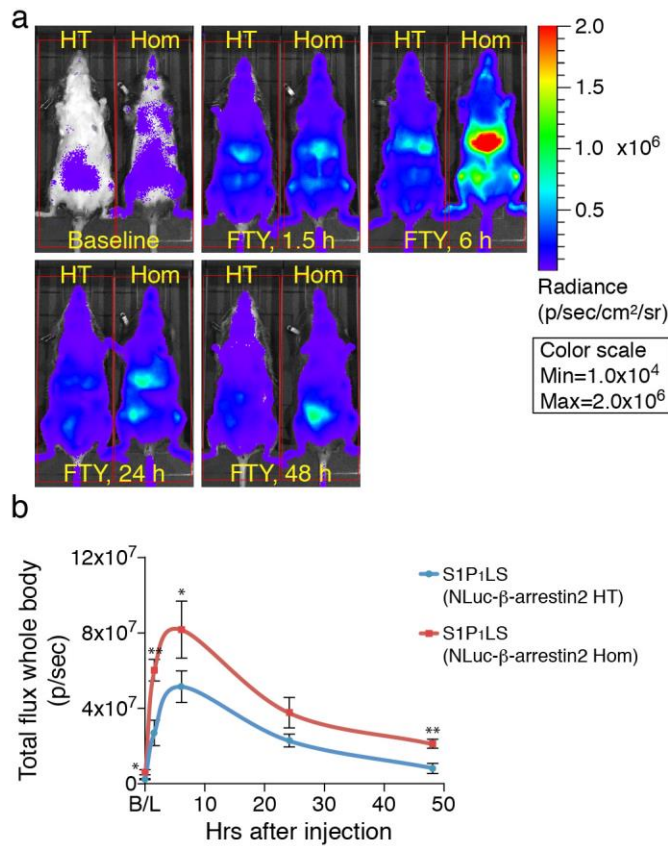

**Supplementary Figure 6. S1P<sub>1</sub> activation by FTY720 in live mice heterozygous or homozygous for the NLuc-β-arrestin2 allele.** Mice were injected with FTY720 (FTY) and subjected to BLI prior to injection (Baseline, B/L) and 1.5, 6, 24, and 48 h after injection. Two genotypes were used: heterozygous for the S1P<sub>1</sub>-CLuc allele (S1P<sub>1</sub>-CLuc) and heterozygous for the NLuc-β-arrestin2 allele (HT); and heterozygous for the S1P<sub>1</sub>-CLuc allele and homozygous for the NLuc-β-arrestin2 allele (Hom). **a**, Representative bioluminescence images of the same mice at specified time points. Mice were imaged in the supine position. A red open rectangle representing the ROI was positioned around the whole body. **b**, The bioluminescence activity was quantified by determining the total flux (photons/sec; p/sec) in the ROI. Data represent the mean ± SEM. n=5 for NLuc-β-arrestin2 heterozygous mice, n=8 for NLuc-β-arrestin2 homozygous mice. *P*-values were determined between NLuc-β-arrestin2 heterozygous and homozygous

groups at each time point by one-way ANOVA followed by Bonferroni's multiple comparisons test; \*,  $P \leq 0.05$ , \*\*,  $P \leq 0.01$ .
